# Supplementary material for: Virtual Primary Care for People With Opioid Use Disorder: Scoping Review of Current Strategies, Benefits, and Challenges
Source: PubMed Central journal article supplement (PMC11650090; doi:10.2196/54015), 2024-12-02
Supplement: jmir_v26i1e54015_app3.pdf [file jmir_v26i1e54015_app3.pdf]

## Appendix III: Data Extraction Template

| General Information                      |                                                                                                                                                                                                                                                                                                                                                                                                                                                                                                                      |
|------------------------------------------|----------------------------------------------------------------------------------------------------------------------------------------------------------------------------------------------------------------------------------------------------------------------------------------------------------------------------------------------------------------------------------------------------------------------------------------------------------------------------------------------------------------------|
| Title                                    |                                                                                                                                                                                                                                                                                                                                                                                                                                                                                                                      |
| Author details                           |                                                                                                                                                                                                                                                                                                                                                                                                                                                                                                                      |
| Paper type                               | <ul style="list-style-type: none"> <li>• Original Research</li> <li>• Brief Report</li> <li>• Review Paper</li> <li>• Conference Abstract</li> <li>• Commentary</li> <li>• Other</li> </ul>                                                                                                                                                                                                                                                                                                                          |
| Country in which study was conducted     | <ul style="list-style-type: none"> <li>• United States</li> <li>• UK</li> <li>• Canada</li> <li>• Australia</li> <li>• Other</li> </ul>                                                                                                                                                                                                                                                                                                                                                                              |
| Publication date                         |                                                                                                                                                                                                                                                                                                                                                                                                                                                                                                                      |
| Funding                                  |                                                                                                                                                                                                                                                                                                                                                                                                                                                                                                                      |
| Characteristics of Included Studies      |                                                                                                                                                                                                                                                                                                                                                                                                                                                                                                                      |
| Methods                                  |                                                                                                                                                                                                                                                                                                                                                                                                                                                                                                                      |
| Purpose of study                         |                                                                                                                                                                                                                                                                                                                                                                                                                                                                                                                      |
| Study design                             | <ul style="list-style-type: none"> <li>• Randomised controlled trial</li> <li>• Non-randomised experimental study</li> <li>• Cohort study</li> <li>• Cross sectional study</li> <li>• Case control study</li> <li>• Systematic review</li> <li>• Qualitative research</li> <li>• Prevalence study</li> <li>• Case series</li> <li>• Case report</li> <li>• Diagnostic test accuracy study</li> <li>• Clinical prediction rule</li> <li>• Economic evaluation</li> <li>• Text and opinion</li> <li>• Other</li> </ul> |
| Population description                   |                                                                                                                                                                                                                                                                                                                                                                                                                                                                                                                      |
| Total number of participants             |                                                                                                                                                                                                                                                                                                                                                                                                                                                                                                                      |
| Description of intervention/study design |                                                                                                                                                                                                                                                                                                                                                                                                                                                                                                                      |
| Type of care for PWOD                    | <ul style="list-style-type: none"> <li>• OAT initiation</li> <li>• OAT follow up</li> <li>• OAT/MOUD general (not specified)</li> <li>• Syringe services</li> <li>• STBBI/HCV/HIV</li> <li>• Mental health (eg. Anxiety/Depression/PTSD)</li> <li>• Other</li> </ul>                                                                                                                                                                                                                                                 |
| Setting of primary care facility         | <ul style="list-style-type: none"> <li>• Family physician clinic</li> <li>• Walk in clinic</li> <li>• Rural clinic</li> <li>• Veterans (VA Hospital/Clinic)</li> <li>• Outpatient OAT/SUD treatment</li> <li>• Community health centres/clinics</li> <li>• Outreach/mobile clinic</li> <li>• Primary care not specified</li> <li>• Other</li> </ul>                                                                                                                                                                  |
| Modalities                               | <ul style="list-style-type: none"> <li>• FaceTime/Zoom Call (Video Conference)</li> <li>• Telephone (Audio only)</li> <li>• In-person</li> <li>• Telemedicine not specified</li> <li>• Other</li> </ul>                                                                                                                                                                                                                                                                                                              |
| Results                                  |                                                                                                                                                                                                                                                                                                                                                                                                                                                                                                                      |
| Patient outcomes or results              |                                                                                                                                                                                                                                                                                                                                                                                                                                                                                                                      |
| Facilitators                             |                                                                                                                                                                                                                                                                                                                                                                                                                                                                                                                      |
| Barriers                                 |                                                                                                                                                                                                                                                                                                                                                                                                                                                                                                                      |
| Relevant health system features          | <ul style="list-style-type: none"> <li>• Private fee and co-pay (finance)</li> <li>• Free/universal access (finance)</li> <li>• Medicare/Medicaid (finance)</li> <li>• Uninsured (finance)</li> <li>• Team-based care/interdisciplinary</li> <li>• Clinicians/Teams Private (delivery)</li> <li>• Clinicians/Teams Public (delivery)</li> <li>• Low-barrier access (if yes include in other)</li> <li>• Other</li> </ul>                                                                                             |
| Future research                          |                                                                                                                                                                                                                                                                                                                                                                                                                                                                                                                      |
| Notes                                    |                                                                                                                                                                                                                                                                                                                                                                                                                                                                                                                      |
