# Supplementary material for: Virtual Primary Care for People With Opioid Use Disorder: Scoping Review of Current Strategies, Benefits, and Challenges
Source: PubMed Central journal article supplement (PMC11650090; doi:10.2196/54015), 2024-12-02
Supplement: jmir_v26i1e54015_app4.pdf [file jmir_v26i1e54015_app4.pdf]

## Appendix IV: Quality Assessment Template (Adapted from [1])

### 1. Theoretical or conceptual underpinning to the research

- |   |                                                                                                                                                                              |                                                                                                                                |
|---|------------------------------------------------------------------------------------------------------------------------------------------------------------------------------|--------------------------------------------------------------------------------------------------------------------------------|
| 0 | No mention at all                                                                                                                                                            |                                                                                                                                |
| 1 | General reference to broad theories or concepts that frame the study                                                                                                         | e.g. key concepts were identified in the introduction section                                                                  |
| 2 | Identification of specific theories or concepts that frame the study and how these informed the work undertaken                                                              | e.g. key concepts were identified in the introduction section and applied to the study                                         |
| 3 | Explicit discussion of the theories or concepts that inform the study, with application of the theory or concept evident through the design, materials and outcomes explored | e.g. key concepts were identified in the introduction section and the application apparent in each element of the study design |

### 2. Statement of research aim/s

- |   |                                                                                                   |
|---|---------------------------------------------------------------------------------------------------|
| 0 | No mention at all                                                                                 |
| 1 | Reference to what the sought to achieve embedded within the report but no explicit aims statement |
| 2 | Aims statement made but may only appear in the abstract or be lacking detail                      |
| 3 | Explicit and detailed statement of aim/s in the main body of report                               |

### 3. Clear description of research setting and target population

- |   |                                                                                   |                                                                                    |
|---|-----------------------------------------------------------------------------------|------------------------------------------------------------------------------------|
| 0 | No mention at all                                                                 |                                                                                    |
| 1 | General description of research area but not of the specific research environment | e.g. 'in primary care'                                                             |
| 2 | Description of research setting is made but is lacking detail                     | e.g. 'in primary care practices in region [x]'                                     |
| 3 | Specific description of the research setting and target population of study       | e.g. 'nurses and doctors from GP practices in [x] part of [x] city in [x] country' |

### 4. The study design is appropriate to address the stated research aim/s

- |   |                                                                                                                                               |                                                                                               |
|---|-----------------------------------------------------------------------------------------------------------------------------------------------|-----------------------------------------------------------------------------------------------|
| 0 | No research aim/s stated or the design is entirely unsuitable                                                                                 | e.g. a Y/N item survey for a study seeking to undertake exploratory work of lived experiences |
| 1 | The study design can only address some aspects of the stated research aim/s                                                                   | e.g. use of focus groups to capture data regarding the frequency and experience of a disease  |
| 2 | The study design can address the stated research aim/s but there is a more suitable alternative that could have been used or used in addition | e.g. addition of a qualitative or quantitative component could strengthen the design          |
| 3 | The study design selected appears to be the most suitable approach to attempt to answer the stated research aim/s                             |                                                                                               |

### 5. Appropriate sampling to address the research aim/s

- |   |                                                                                         |                                                                                                                                                |
|---|-----------------------------------------------------------------------------------------|------------------------------------------------------------------------------------------------------------------------------------------------|
| 0 | No mention of the sampling approach                                                     |                                                                                                                                                |
| 1 | Evidence of consideration of the sample required                                        | e.g. the sample characteristics are described and appear appropriate to address the research aim/s                                             |
| 2 | Evidence of consideration of sample required to address the aim                         | e.g. the sample characteristics are described with reference to the aim/s                                                                      |
| 3 | Detailed evidence of consideration of the sample required to address the research aim/s | e.g. sample size calculation or discussion of an iterative sampling process with reference to the research aims or the case selected for study |

### 6. Rationale for choice of data collection tool/s

- |   |                                                                        |                                                                                                           |
|---|------------------------------------------------------------------------|-----------------------------------------------------------------------------------------------------------|
| 0 | No mention of rationale for data collection tool used                  |                                                                                                           |
| 1 | Very limited explanation for choice of data collection tool/s          | e.g. based on availability of tool                                                                        |
| 2 | Basic explanation of rationale for choice of data collection tool/s    | e.g. based on use in a prior similar study                                                                |
| 3 | Detailed explanation of rationale for choice of data collection tool/s | e.g. relevance to the study aim/s, co- designed with the target population or assessments of tool quality |

### 7. The format and content of data collection tool is appropriate to address the stated research aim/s

- |   |                                                                                                                                                 |                                                                                                                   |
|---|-------------------------------------------------------------------------------------------------------------------------------------------------|-------------------------------------------------------------------------------------------------------------------|
| 0 | No research aim/s stated and/or data collection tool not detailed                                                                               |                                                                                                                   |
| 1 | Structure and/or content of tool/s suitable to address some aspects of the research aim/s or to address the aim/s superficially                 | e.g. single item response that is very general or an open-response item to capture content which requires probing |
| 2 | Structure and/or content of tool/s allow for data to be gathered broadly addressing the stated aim/s but could benefit from refinement          | e.g. the framing of survey or interview questions are too broad or focused to one element of the research aim/s   |
| 3 | Structure and content of tool/s allow for detailed data to be gathered around all relevant issues required to address the stated research aim/s |                                                                                                                   |

### 8. Description of data collection procedure

- |   |                                                                                                                                                                  |                                                                       |
|---|------------------------------------------------------------------------------------------------------------------------------------------------------------------|-----------------------------------------------------------------------|
| 0 | No mention of the data collection procedure                                                                                                                      |                                                                       |
| 1 | Basic and brief outline of data collection procedure                                                                                                             | e.g. 'using a questionnaire distributed to staff'                     |
| 2 | States each stage of data collection procedure but with limited detail or states some stages in detail but omits others                                          | e.g. the recruitment process is mentioned but lacks important details |
| 3 | Detailed description of each stage of the data collection procedure, including when, where and how data was gathered such that the procedure could be replicated |                                                                       |

## Appendix IV: Quality Assessment Template

### 9. Recruitment data provided

- |   |                                                                 |                                                                                                              |
|---|-----------------------------------------------------------------|--------------------------------------------------------------------------------------------------------------|
| 0 | No mention of recruitment data.                                 |                                                                                                              |
| 1 | Minimal and basic recruitment data                              | e.g. number of people invited who agreed to take part.                                                       |
| 2 | Some recruitment data but not a complete account                | e.g. number of people who were invited and agreed.                                                           |
| 3 | Complete data allowing for full picture of recruitment outcomes | e.g. number of people approached, recruited, and who completed with attrition data explained where relevant. |

### 10. Justification for analytic method selected

- |   |                                                                    |                                                                                              |
|---|--------------------------------------------------------------------|----------------------------------------------------------------------------------------------|
| 0 | No mention of the rationale for the analytic method chosen.        |                                                                                              |
| 1 | Very limited justification for choice of analytic method selected. | e.g. previous use by the research team.                                                      |
| 2 | Basic justification for choice of analytic method selected.        | e.g. method used in prior similar research.                                                  |
| 3 | Detailed justification for choice of analytic method selected.     | e.g. relevance to the study aim/s or comment around of the strengths of the method selected. |

### 11. The method of analysis was appropriate to answer the research aim/s

- |   |                                                                                                                                                                        |                                                                                                                                                                                |
|---|------------------------------------------------------------------------------------------------------------------------------------------------------------------------|--------------------------------------------------------------------------------------------------------------------------------------------------------------------------------|
| 0 | No mention at all.                                                                                                                                                     |                                                                                                                                                                                |
| 1 | Method of analysis can only address the research aim/s basically or broadly.                                                                                           |                                                                                                                                                                                |
| 2 | Method of analysis can address the research aim/s but there is a more suitable alternative that could have been used or used in addition to offer a stronger analysis. |                                                                                                                                                                                |
| 3 | Method of analysis selected is the most suitable approach to attempt answer the research aim/s in detail                                                               | e.g. for qualitative interpretative phenomenological analysis might be considered preferable for experiences vs. content analysis to elicit frequency of occurrence of events. |

### 12. Evidence that the research stakeholders have been considered in research design or conduct.

- |   |                                                                                                              |                                                                                                                                                         |
|---|--------------------------------------------------------------------------------------------------------------|---------------------------------------------------------------------------------------------------------------------------------------------------------|
| 0 | No mention at all.                                                                                           |                                                                                                                                                         |
| 1 | Consideration of some the research stakeholders                                                              | e.g. use of pilot study with target sample but no stakeholder involvement in planning stages of study design.                                           |
| 2 | Evidence of stakeholder input informing the research.                                                        | e.g. use of pilot study with feedback influencing the study design/conduct or reference to a project reference group established to guide the research. |
| 3 | Substantial consultation with stakeholders identifiable in planning of study design and in preliminary work. | e.g. consultation in the conceptualisation of the research, a project advisory group or evidence of stakeholder input informing the work.               |

### 13. Strengths and limitations critically discussed

- |   |                                                                                                                                                        |                                                                                                         |
|---|--------------------------------------------------------------------------------------------------------------------------------------------------------|---------------------------------------------------------------------------------------------------------|
| 0 | No mention at all.                                                                                                                                     |                                                                                                         |
| 1 | Very limited mention of strengths and limitations with omissions of many key issues.                                                                   | e.g. one or two strengths/limitations mentioned with limited detail.                                    |
| 2 | Discussion of some of the key strengths and weaknesses of the study but not complete.                                                                  | e.g. several strengths/limitations explored but with notable omissions or lack of depth of explanation. |
| 3 | Thorough discussion of strengths and limitations of all aspects of study including design, methods, data collection tools, sample & analytic approach. |                                                                                                         |

## References

1. Harrison R, Jones B, Gardner P, Lawton R. Quality assessment with diverse studies (QuADS): an appraisal tool for methodological and reporting quality in systematic reviews of mixed- or multi-method studies. BMC Health Serv Res. 2021 Feb 15;21(1):144.
